# Supplementary material for: “Follow the Whistle: Physical Activity Is Calling You”: Evaluation of Implementation and Impact of a Portuguese Nationwide Mass Media Campaign to Promote Physical Activity
Source: MDPI journal article supplement (doi:10.3390/ijerph17218062), 2020-11-02
Supplement: s1 [file s1]

## Online supplementary material

**Table S1.** *Unadjusted* physical activity for all respondents pre-campaign and post-campaign.

|                    | Pre-campaign | Post-campaign | p-value |
|--------------------|--------------|---------------|---------|
| Weekly MET minutes |              |               |         |
| Mean (SE)          |              |               |         |
| Vigorous           | 1,492 (75)   | 1,772 (62)    | <0.01   |
| Moderate           | 1,181 (48)   | 1,160 (40)    | 0.74    |
| Walking            | 1,080 (43)   | 1,090 (35)    | 0.86    |
| Total activity     | 3,641 (120)  | 3,902 (98)    | 0.09    |
| Sitting            | 2,252 (40)   | 2,232 (33)    | 0.70    |

**Table S2.** Adjusted physical activity for all respondents post-campaign by awareness.

|                                                | Unaware     | Aware       | p-value |
|------------------------------------------------|-------------|-------------|---------|
| Identified at least one correct campaign image |             |             |         |
| Adjusted mean (SE)                             |             |             |         |
| Vigorous                                       | 1,798 (101) | 1,757 (76)  | 0.74    |
| Moderate                                       | 1,217 (62)  | 1,127 (47)  | 0.25    |
| Walking                                        | 1,156 (58)  | 1,052 (44)  | 0.15    |
| Total activity                                 | 4,052 (159) | 3,816 (119) | 0.23    |
| Sitting                                        | 2,167 (54)  | 2,271 (41)  | 0.13    |
| Prompted recognition of campaign               |             |             |         |
| Adjusted mean (SE)                             |             |             |         |
| Vigorous                                       | 1,838 (73)  | 1,580 (119) | 0.07    |
| Moderate                                       | 1,160 (46)  | 1,154 (74)  | 0.95    |
| Walking                                        | 1,075 (42)  | 1,136 (68)  | 0.44    |
| Total activity                                 | 3,955 (116) | 3,750 (188) | 0.36    |
| Sitting                                        | 2,252 (40)  | 2,213 (63)  | 0.60    |

Note: Analyses adjusted for age, sex and education.

**Table S3.** Adjusted lifestyle physical activity behaviours variables for all respondents by awareness (prompted).

|                                                                          | Var   | Unaware           | Aware             | p-value |
|--------------------------------------------------------------------------|-------|-------------------|-------------------|---------|
| In the last month have you...                                            |       |                   |                   |         |
| ...climbed the stairs rather than taking the escalator/elevator          | Q31_1 |                   |                   | 0.70    |
| Not often                                                                |       | Ref               | Ref               |         |
| Often                                                                    |       | 1.95 (1.75, 2.17) | 1.85 (1.46, 2.35) |         |
| ...walked rather than going by car                                       | Q31_2 |                   |                   | 0.62    |
| Not often                                                                |       | Ref               | Ref               |         |
| Often                                                                    |       | 1.03 (0.93, 1.14) | 0.96 (0.77, 1.21) |         |
| ...parked the car further or got off public transport early to walk more | Q31_3 |                   |                   | 0.58    |
| Not often                                                                |       | Ref               | Ref               |         |
| Often                                                                    |       | 0.51 (0.46, 0.57) | 0.47 (0.37, 0.6)  |         |
| ...taken break during work to walk or move more                          | Q31_4 |                   |                   | 0.59    |
| Not often                                                                |       | Ref               | Ref               |         |
| Often                                                                    |       | 0.41 (0.37, 0.46) | 0.44 (0.35, 0.57) |         |
| ...chosen to stand when you could sit                                    | Q31_5 |                   |                   | 0.77    |
| Not often                                                                |       | Ref               | Ref               |         |
| Often                                                                    |       | 0.6 (0.54, 0.66)  | 0.62 (0.49, 0.78) |         |
| ...chosen to do things manually, when you could use machines             | Q31_6 |                   |                   |         |
| Not often                                                                |       | Ref               | Ref               | 0.64    |
| Often                                                                    |       | 0.39 (0.35, 0.44) | 0.42 (0.32, 0.54) |         |

Note: Analyses adjusted for age, sex and education.

**Table S4.** Adjusted theoretical (COM-B) variables for all respondents by awareness (prompted).

|                                                                                                   | Var   | Unaware     | Aware       | p-value |
|---------------------------------------------------------------------------------------------------|-------|-------------|-------------|---------|
| <i>Perceived capability</i>                                                                       |       |             |             |         |
| <u>Knowledge</u>                                                                                  |       |             |             |         |
| Climbing stairs or walking are not physical activity                                              | Q20_1 | 2.26 (0.05) | 2.05 (0.11) | 0.10    |
| Only high intensity activity has benefits                                                         | Q20_2 | 1.59 (0.03) | 1.55 (0.07) | 0.64    |
| <u>Self-efficacy</u>                                                                              |       |             |             |         |
| I am confident that I can keep active on a regular basis, even when....                           |       |             |             |         |
| I have little time                                                                                | Q28_1 | 4.40 (0.05) | 4.78 (0.1)  | <0.01   |
| I'm not in great physical shape                                                                   | Q28_2 | 4.67 (0.04) | 4.92 (0.1)  | 0.02    |
| I do not have specific equipment                                                                  | Q28_3 | 4.89 (0.05) | 5.20 (0.11) | <0.01   |
| I do not have much money                                                                          | Q28_4 | 5.02 (0.05) | 5.03 (0.11) | 0.92    |
| I can integrate physical activity into my day                                                     | Q20_4 | 5.08 (0.04) | 5.78 (0.10) | <0.001  |
| Currently, it is relatively easy for me to walk or bicycle for at least part of my daily journeys | Q26_5 | 4.18 (0.06) | 4.37 (0.13) | 0.16    |
| <i>Perceived opportunity</i>                                                                      |       |             |             |         |
| <u>Physical and social environment</u>                                                            |       |             |             |         |
| There are many opportunities to be active where I live                                            | Q26_2 | 5.24 (0.04) | 5.57 (0.1)  | <0.001  |
| There are not opportunities for me to be active                                                   | Q26_3 | 3.49 (0.05) | 3.12 (0.12) | <0.01   |
| In my day to day life, there are spaces, situations, or people that encourage me to move more     | Q26_4 | 4.16 (0.05) | 4.41 (0.11) | 0.03    |
| <u>Social norms</u>                                                                               |       |             |             |         |
| Where I work/live, I often see other people being active                                          | Q29_4 | 5.55 (0.04) | 5.63 (0.10) | 0.49    |
| I know a lot of people who are not active                                                         | Q30_1 | 5.46 (0.04) | 5.38 (0.09) | 0.45    |
| There are more people who use public transport or bicycles compared to cars                       | Q30_2 | 3.98 (0.05) | 4.06 (0.11) | 0.51    |
| There are more and more people being active                                                       | Q30_4 | 5.71 (0.03) | 5.74 (0.07) | 0.73    |
| <i>Motivation</i>                                                                                 |       |             |             |         |
| <u>Outcome expectancies</u>                                                                       |       |             |             |         |
| Physical activity improves my quality of life                                                     | Q20_3 | 6.84 (0.02) | 6.96 (0.05) | 0.03    |
| <u>Interest</u>                                                                                   |       |             |             |         |
| Physical activity is as important as other things in my life                                      | Q29_1 | 5.30 (0.04) | 5.52 (0.10) | 0.04    |
| <u>Enjoyment</u>                                                                                  |       |             |             |         |
| I like to do physical activity                                                                    | Q29_2 | 5.34 (0.05) | 5.63 (0.10) | 0.02    |
| <u>Locus of causality</u>                                                                         |       |             |             |         |
| I do physical activity because I want to, not because I have to                                   | Q29_3 | 4.69 (0.05) | 4.85 (0.12) | 0.23    |
| <u>Intention</u>                                                                                  |       |             |             |         |
| I intend to do more physical activity in the near future                                          | Q30_3 | 5.3 (0.04)  | 5.47 (0.10) | 0.09    |

Note: Analyses adjusted for age, sex and education. Response ranged from 1 (fully disagree) to 7 (fully agree).

**Table S5.** Adjusted theoretical (Com-B) variables for all respondents by awareness (image recognition).

|                                                                                                   | Var   | Unaware     | Aware       | p-value |
|---------------------------------------------------------------------------------------------------|-------|-------------|-------------|---------|
| <i>Perceived capability</i>                                                                       |       |             |             |         |
| <u>Knowledge</u>                                                                                  |       |             |             |         |
| Climbing stairs or walking are not physical activity                                              | Q20_1 | 2.29 (0.05) | 2.08 (0.1)  | 0.06    |
| Only high intensity activity has benefits                                                         | Q20_2 | 1.6 (0.03)  | 1.52 (0.06) | 0.23    |
| <u>Self-efficacy</u>                                                                              |       |             |             |         |
| I am confident that I can keep active on a regular basis, even when....                           |       |             |             |         |
| I have little time                                                                                | Q28_1 | 4.41 (0.05) | 4.73 (0.09) | <0.01   |
| I'm not in great physical shape                                                                   | Q28_2 | 4.67 (0.04) | 4.90 (0.08) | 0.02    |
| I do not have specific equipment                                                                  | Q28_3 | 4.92 (0.05) | 5.00 (0.1)  | 0.48    |
| I do not have much money                                                                          | Q28_4 | 5.00 (0.05) | 5.03 (0.1)  | 0.83    |
| I can integrate physical activity into my day                                                     | Q20_4 | 5.06 (0.04) | 5.71 (0.09) | <0.001  |
| Currently, it is relatively easy for me to walk or bicycle for at least part of my daily journeys | Q26_5 | 4.17 (0.06) | 4.42 (0.11) | 0.04    |
| <i>Perceived opportunity</i>                                                                      |       |             |             |         |
| <u>Physical and social environment</u>                                                            |       |             |             |         |
| There are many opportunities to be active where I live                                            | Q26_2 | 5.25 (0.04) | 5.53 (0.08) | <0.01   |
| There are not opportunities for me to be active                                                   | Q26_3 | 3.49 (0.05) | 3.21 (0.1)  | 0.02    |
| In my day to day life, there are spaces, situations, or people that encourage me to move more     | Q26_4 | 4.16 (0.05) | 4.45 (0.09) | <0.01   |
| <u>Social norms</u>                                                                               |       |             |             |         |
| Where I work/live, I often see other people being active                                          | Q29_4 | 5.54 (0.04) | 5.71 (0.08) | 0.07    |
| I know a lot of people who are not active                                                         | Q30_1 | 5.45 (0.04) | 5.41 (0.08) | 0.66    |
| There are more people who use public transport or bicycles compared to cars                       | Q30_2 | 3.97 (0.05) | 4.22 (0.09) | <0.01   |
| There are more and more people being active                                                       | Q30_4 | 5.69 (0.03) | 5.82 (0.06) | 0.05    |
| <i>Motivation</i>                                                                                 |       |             |             |         |
| <u>Outcome expectancies</u>                                                                       |       |             |             |         |
| Physical activity improves my quality of life                                                     | Q20_3 | 6.82 (0.02) | 6.94 (0.04) | 0.02    |
| <u>Interest</u>                                                                                   |       |             |             |         |
| Physical activity is as important as other things in my life                                      | Q29_1 | 5.31 (0.04) | 5.48 (0.08) | 0.07    |
| <u>Enjoyment</u>                                                                                  |       |             |             |         |
| I like to do physical activity                                                                    | Q29_2 | 5.36 (0.05) | 5.56 (0.09) | 0.04    |
| <u>Locus of causality</u>                                                                         |       |             |             |         |
| I do physical activity because I want to, not because I have to                                   | Q29_3 | 4.73 (0.05) | 4.81 (0.1)  | 0.43    |
| <u>Intention</u>                                                                                  |       |             |             |         |
| I intend to do more physical activity in the near future                                          | Q30_3 | 5.32 (0.04) | 5.39 (0.08) | 0.43    |

Note: Analyses adjusted for age, sex and education. Response ranged from 1 (fully disagree) to 7 (fully agree).
